# Supplementary material for: Ion-selective gold–thiol film on integrated screen-printed electrodes for analysis of Cu(ii) ions
Source: Royal Society of Chemistry journal article supplement (doi:10.1039/c3an01860a), 2013-11-11
Supplement: c3an01860a.pdf [file c3an01860a.pdf]

## **Ion-selective gold-thiol film on integrated screen-printed electrodes for analysis of Cu(II) ions**

Meng Li, Hao Zhou, Lei Shi, Da-Wei Li, Yi-Tao Long\*

Key Laboratory for Advanced Materials & Department of Chemistry, East China University of  
Science and Technology, 130 Meilong Road, Shanghai, 200237, P.R. China

Email: ytlong@ecust.edu.cn

**This supporting material contains the synthesis procedure of 6-(bis(pyridin-2-ylmethyl)amino)hexane-1-thiol, supplementary data on the optimization of some experimental conditions and characterization of 6-(bis(pyridin-2-ylmethyl)amino)hexane-1-thiol.**

### **Contents:**

- Section I     synthetic procedure of 6-(bis(pyridin-2-ylmethyl)amino)hexane-1-thiol;
- Section II    optimization of experimental conditions;
- Section III    characterization of 6-(bis(pyridin-2-ylmethyl)amino)hexane-1-thiol.

## Section I. Synthesis procedure of 6-(bis(pyridin-2-ylmethyl)amino)hexane-1-thiol

### Synthesis of bis(2-pyridylmethyl)amine (DPA) (3)

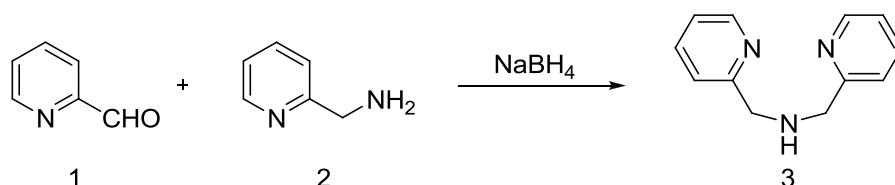

2-pyridinecarbaldehyde (2.51 g, 23.5 mmol) was dissolved in 50 mL methanol, and pyridin-2-ylmethanamine (2.54 g, 23.5 mmol) was added dropwise under ice-bath condition. The mixture was stirred for 1 h at room temperature. After that, NaBH<sub>4</sub> (0.89 g, 23.5 mmol) was added in portions at 0°C. The solution was stirred overnight, quenched with the addition of HCl, cooled with an ice-bath and then pH adjusted to 4. After removing the solvent, 25 mL H<sub>2</sub>O was added to the residue. The solvent was extracted with CH<sub>2</sub>Cl<sub>2</sub> until the organic phase became colorless. The aqueous phase was separated and its pH was adjusted to 10 using Na<sub>2</sub>CO<sub>3</sub> and the product was extracted with CH<sub>2</sub>Cl<sub>2</sub>. The solvent was dried with anhydrous Na<sub>2</sub>SO<sub>4</sub>, removed under vacuum. The product was obtained without further purification (4.10 g, 85%). <sup>1</sup>H NMR δ = (400 MHz, CDCl<sub>3</sub>) 8.61 – 8.51 (2 H, m), 7.63 (2 H, td, *J* = 7.6, 1.9), 7.39 – 7.27 (2 H, m), 7.18 – 7.09 (2 H, m), 3.98 (4 H, d, *J* = 1.8), 2.78 (1 H, s).

### Synthesis of 6-bromohexyl ethanethioate (4)

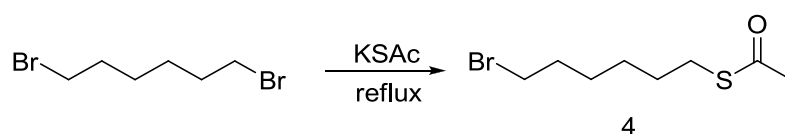

A solution of 1, 2-dibromohexthane (6.0 g, 24.8 mmol) and potassium thioacetate (1.4 g, 12.4 mmol,) in anhydrous THF (50 mL) was refluxed for 12 hours under argon. After cooling to room temperature, the KBr was removed by vacuum filtration. The solvent in the filtrate was removed under reduced pressure using a rotary evaporator. The residue was purified with column chromatography to give product **4** (1.9 g, 65%). <sup>1</sup>H NMR (400 MHz, CDCl<sub>3</sub>) δ = 3.40 (t, *J* = 6.8, 2H), 2.87 (t, *J* = 7.3, 2H), 2.33 (s, 3H), 1.93 – 1.79 (m, 2H), 1.59 (m, 2H), 1.52 – 1.31 (m, 4H).

### Synthesis of 6-(bis(pyridin-2-ylmethyl)amino)hexyl ethanethioate (**5**)

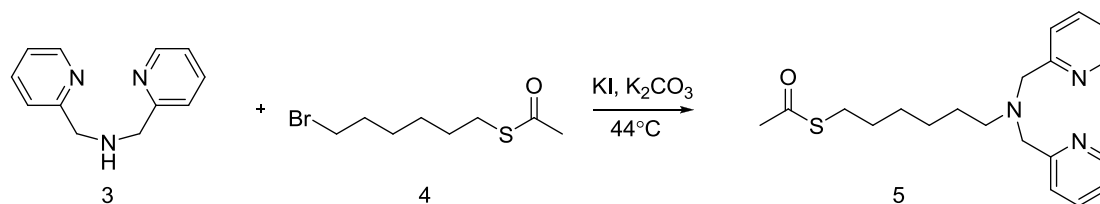

To a solution containing **4** (0.238g, 1.0 mmol), K<sub>2</sub>CO<sub>3</sub> (0.276 g, 2.0 mmol) and KI (0.033g, 0.2 mmol) in 15 mL acetone was added dropwise a solution of DPA **3** (0.298g, 1.5 mmol) in 5 mL acetone. The mixture was stirred for 18h at 44 °C, then filtered. The solvent was removed under vacuum and the residue was purified with column chromatography to give product **6** (0.239g, 67%). <sup>1</sup>H NMR δ<sub>H</sub> (400 MHz, CDCl<sub>3</sub>) 8.55 – 8.49 (2 H, m), 7.66 (2 H, td, *J* = 7.7, 1.8), 7.53 (2 H, d, *J* = 7.8), 7.17 – 7.11 (2 H, m), 3.80 (4 H, s), 2.86 – 2.78 (2 H, m), 2.53 (2 H, dd, *J* = 13.4, 6.1), 2.31 (3H, s), 1.51 (4 H, dt, *J* = 11.3, 5.3), 1.34 – 1.22 (4 H, m).

### Synthesis of 6-(bis(pyridin-2-ylmethyl)amino)hexane-1-thiol (compound **a**)

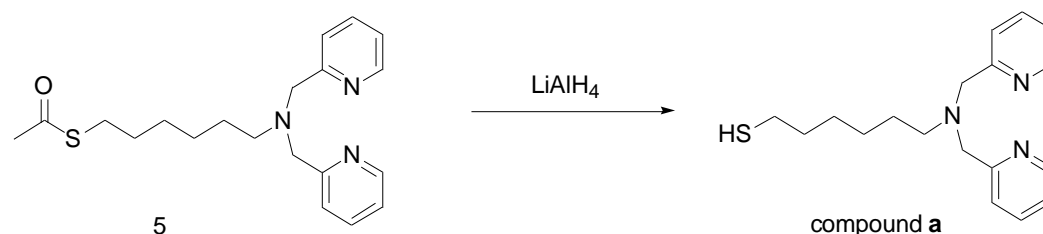

To a solution of LiAlH<sub>4</sub> (0.172 g, 4.0 mmol) in dry THF (5mL) was added dropwise at 0°C a solution of **5** (0.357 g, 1.0 mmol) in dry THF (5mL) over 15 min. The mixture was stirred for 4 h, and then poured into ice water (50 mL). The white precipitation was filtered. The water phase was extracted with CH<sub>2</sub>Cl<sub>2</sub> (30 mL×3). The organic phase was collected and dried with anhydrous Na<sub>2</sub>SO<sub>4</sub>. The solvent was removed under vacuum. The crude product was purified with column chromatography to give product (0.2 g, 63%). <sup>1</sup>H NMR δ (400 MHz, CDCl<sub>3</sub>) 8.44 (2 H, d, *J* 4.2), 7.58 (2 H, td, *J* = 7.7, 1.7), 7.46 (2 H, d, *J* = 7.8), 7.07 (2 H, dd, *J* = 6.5, 5.3), 3.75 (4 H, s), 2.58 – 2.44 (4 H, m), 1.60 – 1.41 (4 H, m), 1.30 – 1.13 (4 H, m). <sup>13</sup>C NMR δ (101 MHz, CDCl<sub>3</sub>) 159.86, 148.95, 136.39, 122.86, 121.91, 60.44, 54.34, 38.94, 29.69, 29.13, 28.77, 28.32, 26.90. HRMS (EI<sup>+</sup>) calculated 315.1769, found 315.1766.

## Section II. Optimization of experimental conditions

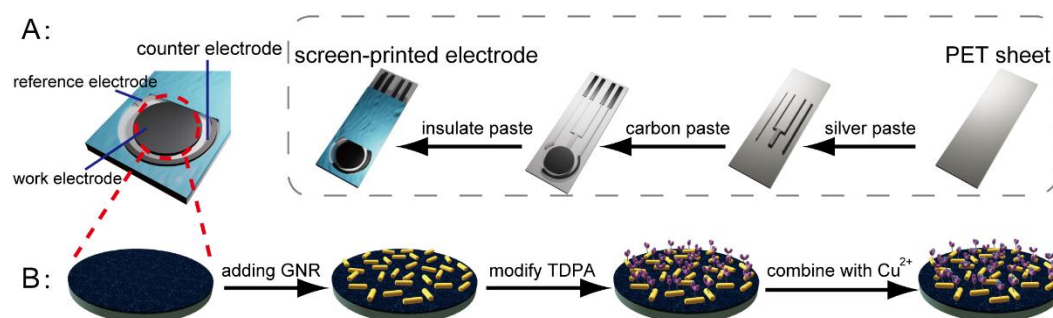

**Fig. S1** The procedure for preparing (A) screen-printed electrodes (SPEs) and (B) modified ion-selective electrodes (ISEs) for Cu(II) ions detection.

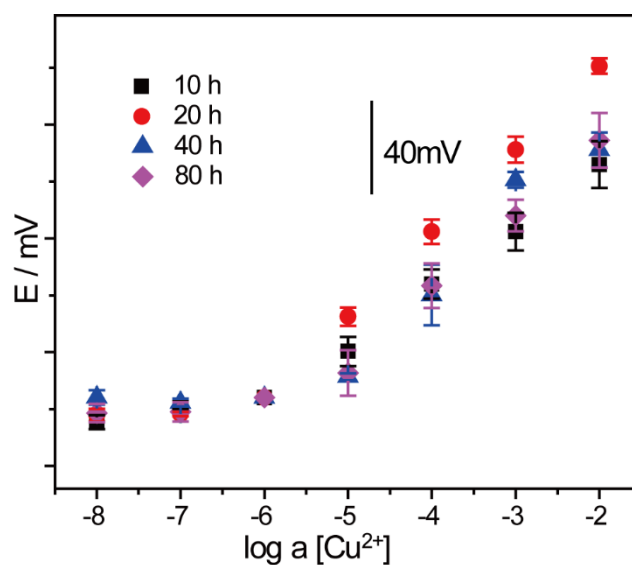

**Fig. S2** The effect of the self-assembly time on the potentiometric response to different concentration of Cu(II) ions.

**Table S1** The calculated values for  $R_s$ ,  $R_{ct}$ ,  $C_{dl}$ , CPE and  $Z_w$  in the equivalent circuit models of the impedance data.

|          | Bare SPE             | GNR/SPE              | comp. a/GNR/SPE      | comp. a-Cu/GNR/SPE    |
|----------|----------------------|----------------------|----------------------|-----------------------|
| $R_s$    | 258.0                | 148.7                | 855.5                | 636.9                 |
| $C_{dl}$ | $2.8 \times 10^{-7}$ | $5.9 \times 10^{-7}$ | -                    | -                     |
| $R_{ct}$ | 1083.0               | 303.5                | 2909                 | 1009                  |
| $Z_w$    | 0.2                  | 0.0014               | 0.00076              | 0.0013                |
| CPE      | -                    | -                    | $1.9 \times 10^{-6}$ | $4.25 \times 10^{-6}$ |
| n        | -                    | -                    | 0.79                 | 0.74                  |

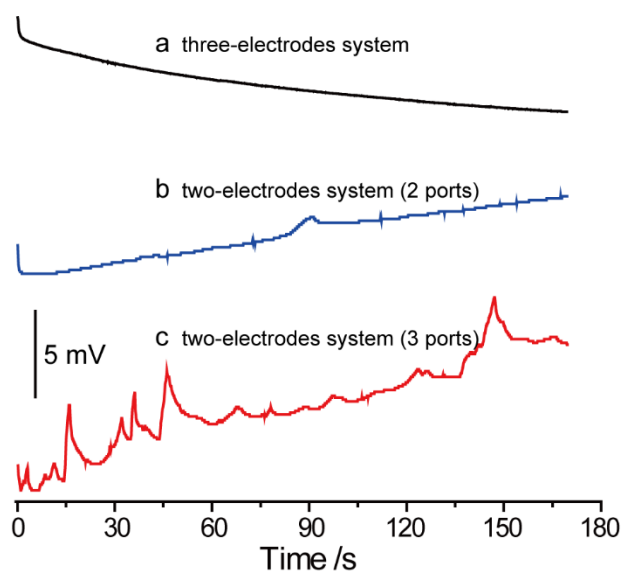

**Fig. S3** The open-circuit potential recorded when SPEs immersed in blank solution under (a) three-electrodes system; (b) two-electrodes system with 2 ports connected (working electrode port and reference electrode port) and (c) two-electrodes system with 3 ports connected (auxiliary electrode and reference electrode ports are connected to Ag/AgCl reference electrode).

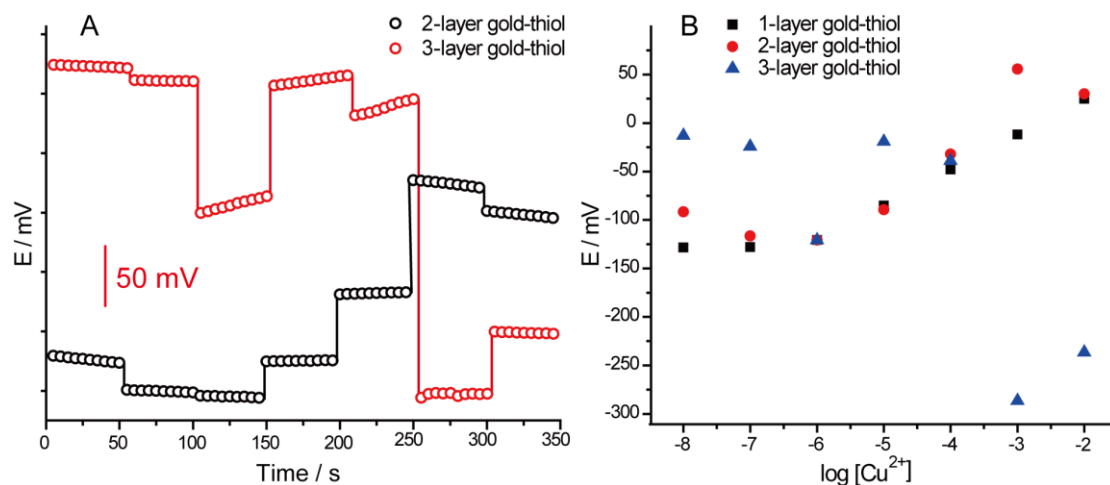

**Fig. S4** (A) The open-circuit potential responses of 2-layer gold-thiol modified SPE (black) and 3-layer gold-thiol modified SPE (red) against time recorded in  $\text{CuSO}_4$  solution over the range from  $1.0 \times 10^{-8}$  to  $1.0 \times 10^{-2}$  M and (B) the corresponding potential responses against the concentration of  $\text{Cu(II)}$  ions of 2-layer gold-thiol modified SPE (circle) and 3-layer gold-thiol modified SPE (triangle) compared to the 1-layer gold-thiol modified SPE (square). For comparison, experimental lines were shifted to give the same value at  $1.0 \times 10^{-6}$  M  $\text{CuSO}_4$ .

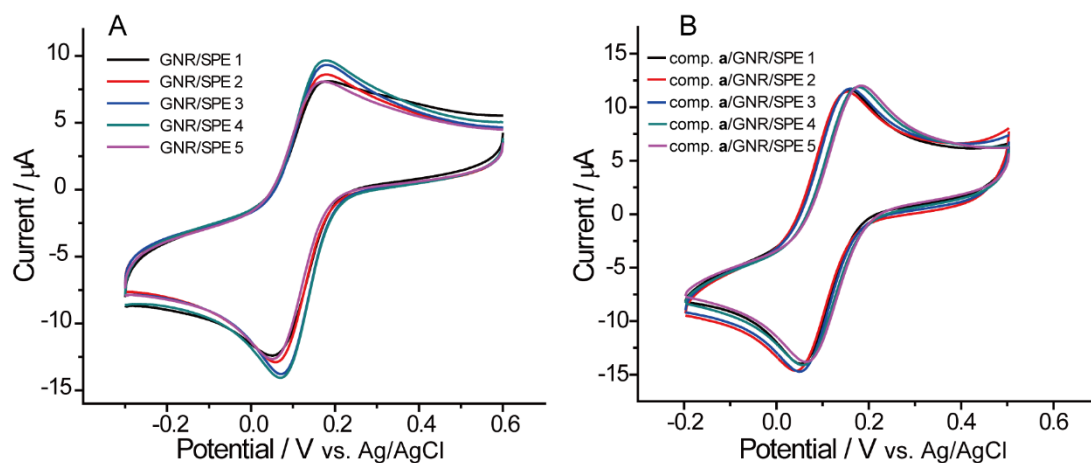

**Fig. S5** CVs of (A) different GNR/SPEs and (B) compound **a**/GNR/SPEs in the presence of 1.0 mM  $\text{K}_3\text{Fe(CN)}_6$  redox label solution that included 0.5 M  $\text{KNO}_3$ .

### Section III. Characterization of 6-(bis(pyridin-2-ylmethyl)amino)hexane-1-thiol

#### $^1\text{H}$ NMR, $^{13}\text{C}$ NMR and MS characterization of intermediates and target compounds

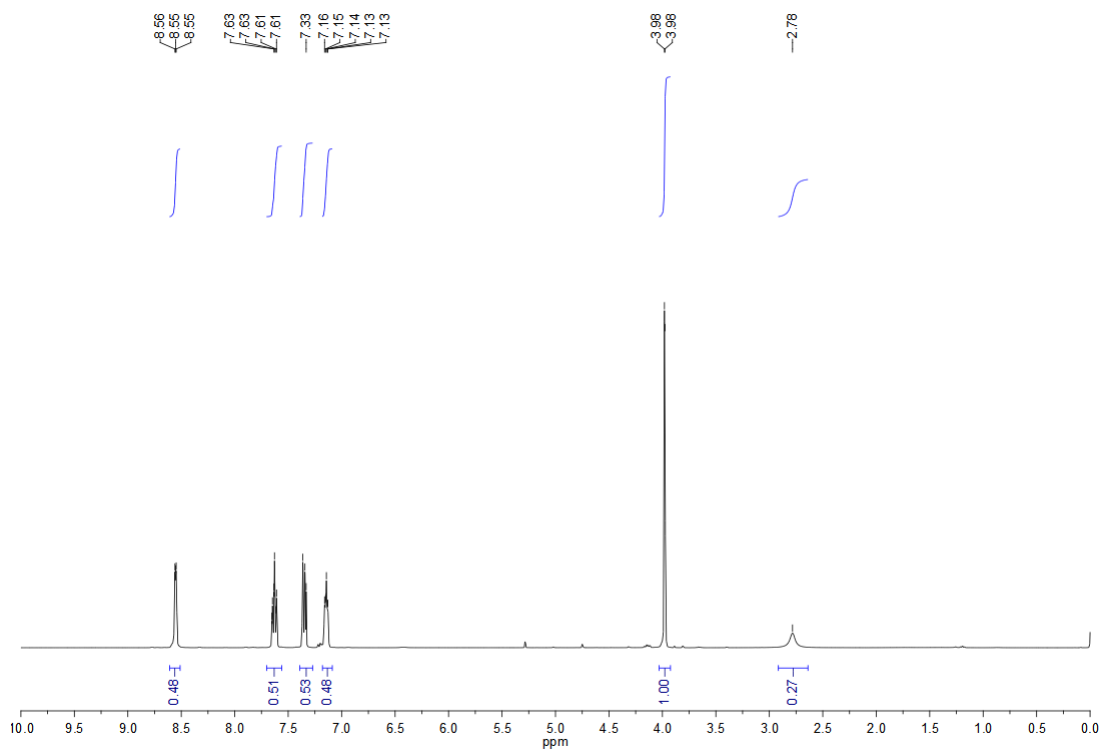

**Fig. S6**  $^1\text{H}$  NMR of bis(2-pyridylmethyl)amine.

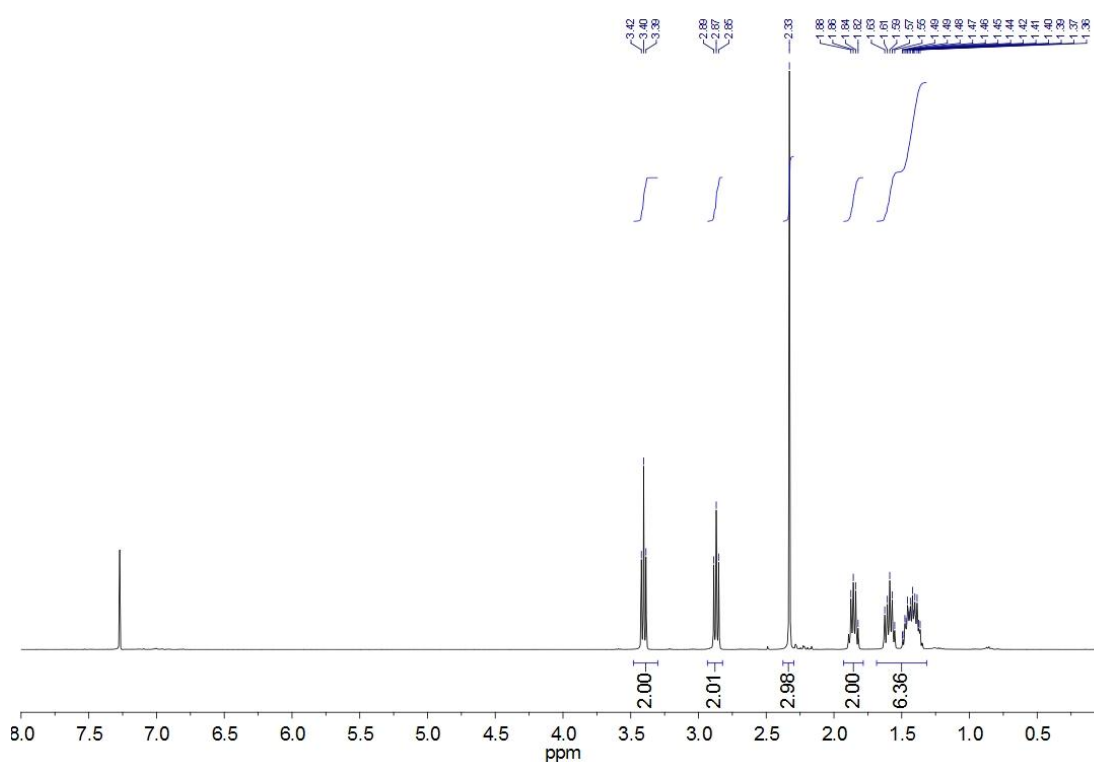

**Fig. S7** <sup>1</sup>H NMR spectrum of 6-bromohexyl ethanethioate.

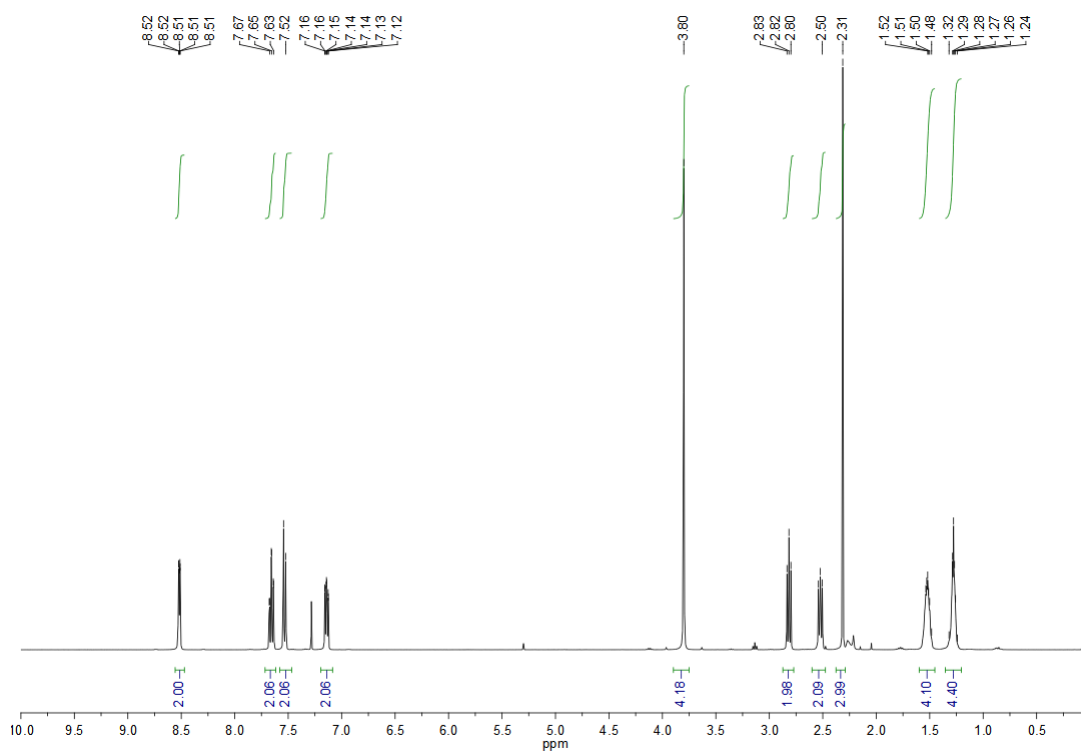

**Fig. S8** <sup>1</sup>H NMR of 6-(bis(pyridin-2-ylmethyl)amino)hexyl ethanethioate.



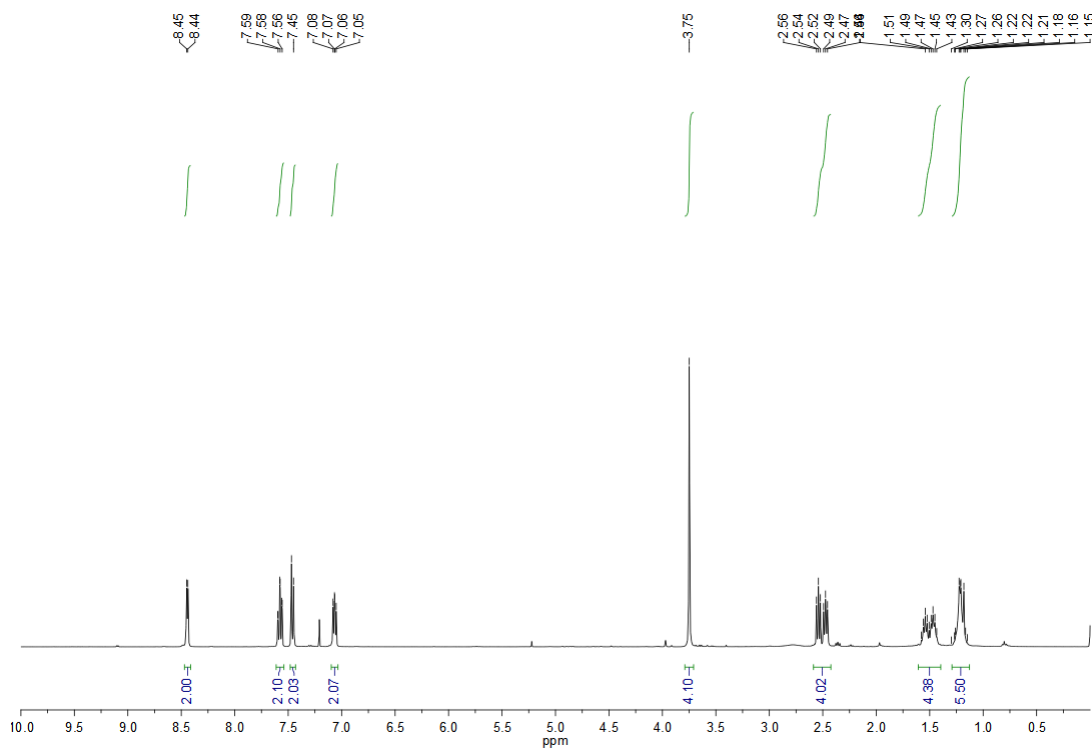

**Fig. S9** <sup>1</sup>H NMR of 6-(bis(pyridin-2-ylmethyl)amino)hexane-1-thiol.

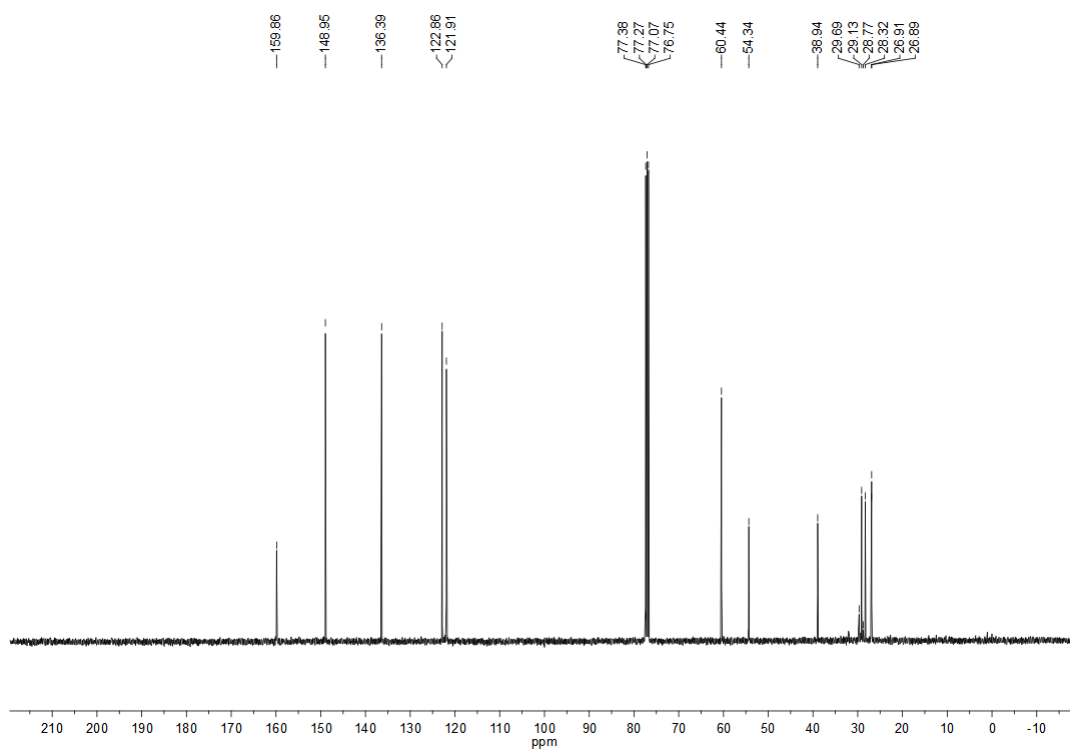

**Fig. S10** <sup>13</sup>C NMR of 6-(bis(pyridin-2-ylmethyl)amino)hexane-1-thiol.

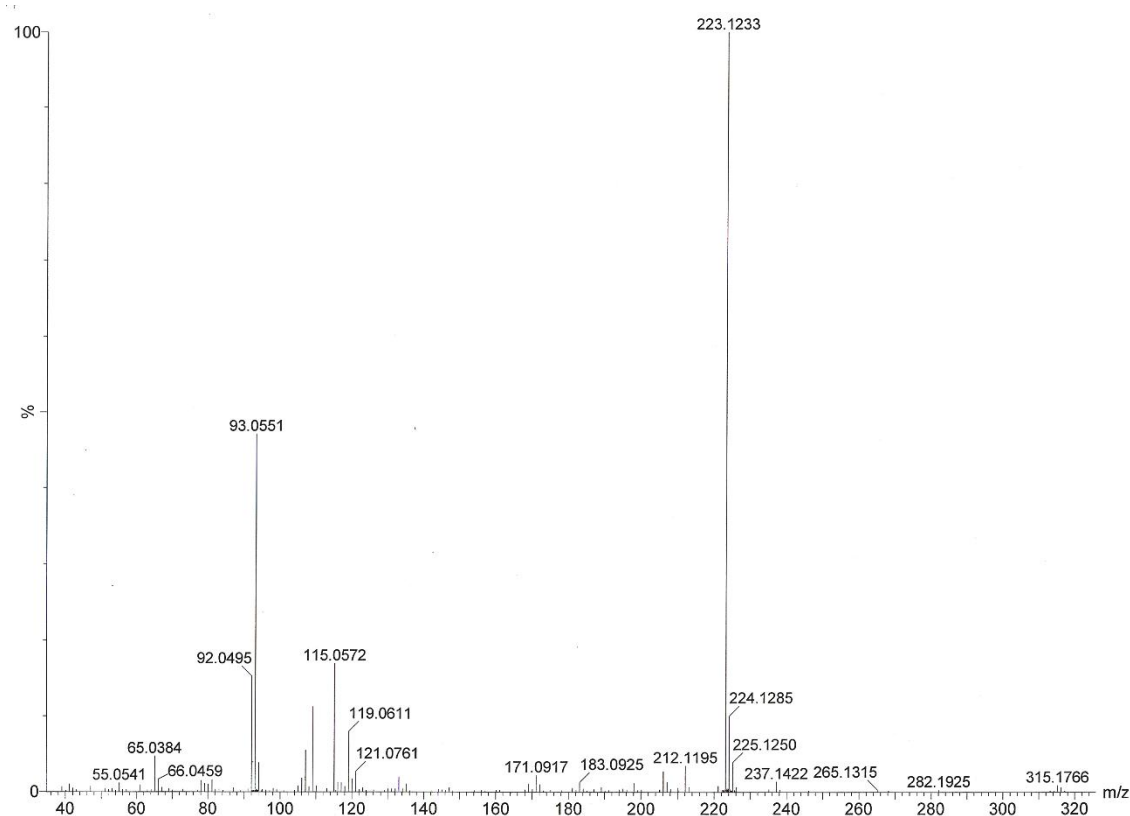

**Fig. S11** HRMS (EI+) of 6-(bis(pyridin-2-ylmethyl)amino)hexane-1-thiol.
